# Supplementary material for: Towards developing an organotypic model for the preclinical study and manipulation of human hair matrix-dermal papilla interactions
Source: Springer Nature journal article supplement (doi:10.1007/s00403-020-02178-8), 2021-01-12
Supplement: MOESM1 [file 18761650]

### Online Resource 1

Title: Towards developing an organotypic model for the preclinical study and manipulation of human hair matrix-dermal papilla interactions

Journal: Archives of Dermatological Research

Authors: Christopher I Platt\*, Jeremy Chéret, Ralf Paus

Corresponding author: [Christopher.platt@manchester.ac.uk](mailto:Christopher.platt@manchester.ac.uk). Division of Cell Matrix Biology and Regenerative Medicine, The University of Manchester, Manchester, UK

### Antibodies, fixatives and blocking reagents used for immunofluorescence

| Target      | Protocol                                                                               | Primary antibody                                                                                   | Secondary antibody                                                      |
|-------------|----------------------------------------------------------------------------------------|----------------------------------------------------------------------------------------------------|-------------------------------------------------------------------------|
| Versican    | 4% paraformaldehyde,<br>0.1% triton-X100,<br>3% BSA                                    | Mouse anti-versican (1:400;<br>Developmental Studies<br>Hybridoma Bank, the<br>University of Iowa) | Goat anti-mouse Alexafluor<br>488 and 594 (1:200; Life<br>Technologies) |
| Ki-67       | Acetone<br>10% normal goat serum                                                       | Rabbit anti-Ki-67 (1:100;<br>abcam)                                                                | Goat anti-rabbit Alexafluor<br>594 (1:200; Life<br>Technologies)        |
| K85         | Acetone<br>10% normal goat serum                                                       | Guinea pig anti-K85<br>antibody (1:1000; gift from<br>Lutz Langbein)                               | Goat anti-guinea pig<br>Alexafluor 488 (1:200; Life<br>Technologies)    |
| Noggin      | Methanol,<br>10% normal goat serum                                                     | Rabbit anti-noggin (1:500;<br>abcam)                                                               | Goat anti-rabbit Alexafluor<br>488 (1:800; Life<br>Technologies)        |
| Fibronectin | 1% paraformaldehyde,<br>ethanol: glacial acetic acid<br>(1:1)<br>10% normal goat serum | Mouse anti-fibronectin<br>antibody (1:1000; abcam)                                                 | Goat anti-mouse Alexafluor<br>594 (1:200; Life<br>Technologies)         |
